# Supplementary material
Source: ML conference proceedings conference paper supplement (https://openreview.net/forum?id=crbPFR2Hpv)
Supplement: supplementary_material [file attachment]

## A Encounter Model Details

Table 1: Parameters for data generation.

| Parameter                 | Minimum | Maximum | Unit    |
|---------------------------|---------|---------|---------|
| Ownship Horizontal Speed  | 60      | 70      | m/s     |
| Intruder Horizontal Speed | 60      | 70      | m/s     |
| Horizontal Miss Distance  | 0       | 100     | meters  |
| Vertical Miss Distance    | -30     | 30      | meters  |
| Relative Heading          | 100     | 260     | degrees |

In order to simplify the representation of encounters in this study, we adopt a model where the ownship and intruder aircraft move along straight-line trajectories with constant horizontal speeds. To generate an encounter, we follow a two-step process. First, we randomly sample a set of encounter features from uniform distributions within the specified ranges presented in table 1. We then use these features to generate trajectories for both the ownship and intruder aircraft. The horizontal and vertical miss distance parameters indicate the range between the ownship and intruder aircraft and their relative altitude at the point of closest approach. These distances are deliberately chosen to ensure that all encounters result in a near mid-air collision (NMAC) if no collision avoidance action is taken.

Each simulated encounter has a duration of 50 seconds, with the closest point of approach occurring 40 seconds into the encounter. The range of relative headings is selected to generate encounters that are nearly head-on, with the intruder aircraft typically within the ownship’s field of view. The features specified in table 1 completely determine the relative trajectories of the ownship and intruder aircraft. Once the relative trajectories are generated, we randomly position both trajectories around the origin region by applying rotations and shifts.

## B Dataset Details

The AVOIDDS dataset was generated to include 72,000 images, of which 64,800 are training images and 7200 are validation images. These images are accompanied by 72,000 label files. Table 2 shows the number of images for each variable category while table 3 shows the exact distributions used to generate the images. Equal amounts of each cloud covering, region, and aircraft type are represented, and the other variables were randomized for each image.

The range between the ownship and intruder aircraft was sampled from a gamma distribution with shape and scale parameters dependent on the aircraft type. We sampled the distances for the Cessna Skyhawk and King Air C90 from a gamma distribution with shape 2 and scale 200, and the Boeing 737-800 distances were sampled from a gamma distribution with shape 3 and scale 200. The expected value of  $\Gamma(3, 200)$  is about 200 m more than that of  $\Gamma(2, 200)$  which we intended to account for the larger size of the Boeing 737-800 aircraft relative to the smaller aircraft. A gamma distribution allows us to sample from a distribution that is skewed toward closer ranges, where aircraft are more likely to be visible in the image. To ensure that the aircraft were not positioned too close together, we verified that the sampled values were greater than 20 m for the Cessna Skyhawk and King Air C90 and 50 m for the Boeing 737-800. The position vertically and horizontally of the intruder was sampled uniformly within the ownship field of view. The time of day for each sample was randomized between 08:00 and 17:00 on January 1st in each respective location’s local time. We split the day into 4 time windows for evaluation purposes: morning (08:00-10:00), midday (10:00-13:00), afternoon (13:00-15:00), and late afternoon (15:00-17:00).

## C Additional Results

Table 4 shows the specific test set evaluation values for the baseline and alternative models discussed, specifically precision, recall, and mAP. These can be compared to the downstream task metrics shown in table 5, which includes the frequencies of NMAC and advisory.

Table 2: AVOIDDS dataset overview.

| Attribute          | Value               | Number of images |          |            |
|--------------------|---------------------|------------------|----------|------------|
|                    |                     | Total            | Training | Validation |
| All                | -                   | 72,000           | 64,800   | 7200       |
| Clouds             | Clear               | 12,000           | 10,800   | 1200       |
|                    | High Cirrus         | 12,000           | 10,800   | 1200       |
|                    | Scattered           | 12,000           | 10,800   | 1200       |
|                    | Broken              | 12,000           | 10,800   | 1200       |
|                    | Overcast            | 12,000           | 10,800   | 1200       |
|                    | Stratus             | 12,000           | 10,800   | 1200       |
| Region             | Palo Alto, CA (PAO) | 18,000           | 16,200   | 1800       |
|                    | Boston, MA (BOS)    | 18,000           | 16,200   | 1800       |
|                    | Oshkosh, WI (OSH)   | 18,000           | 16,200   | 1800       |
|                    | Reno, NV (RNO)      | 18,000           | 16,200   | 1800       |
| Aircraft type      | Cessna Skyhawk      | 24,000           | 21,600   | 2400       |
|                    | Boeing 737-800      | 24,000           | 21,600   | 2400       |
|                    | King Air C90        | 24,000           | 21,600   | 2400       |
| Range              | 0–150 m             | 9124             | 8268     | 856        |
|                    | 150–500 m           | 35,932           | 32,303   | 3629       |
|                    | >500 m              | 26,944           | 24,229   | 2715       |
| Intruder rel. alt. | Below               | 36,048           | 32,482   | 3566       |
|                    | Above               | 35,952           | 32,318   | 3634       |
| Time of day        | Morning             | 15,930           | 14,385   | 1545       |
|                    | Midday              | 24,142           | 21,722   | 2420       |
|                    | Afternoon           | 15,954           | 14,269   | 1685       |
|                    | Late Afternoon      | 15,974           | 14,424   | 1550       |

Table 3: Parameters for the AVOIDDS Dataset.

| Parameter                               | Minimum | Maximum | Distribution                | Unit    |
|-----------------------------------------|---------|---------|-----------------------------|---------|
| Ownship distance east/north from origin | −5000   | 5000    | $\mathcal{U}(-5000, 5000)$  | meters  |
| Ownship distance vertically from origin | −1000   | 1000    | $\mathcal{U}(-1000, 1000)$  | meters  |
| Ownship and intruder heading            | 0       | 360     | $\mathcal{U}(0, 360)$       | degrees |
| Ownship pitch                           | −30     | 30      | $\mathcal{N}(0, 5)$         | degrees |
| Ownship roll                            | −45     | 45      | $\mathcal{N}(0, 10)$        | degrees |
| Time of day                             | 08:00   | 17:00   | $\mathcal{U}(08:00, 17:00)$ | hours   |

## D Experiment Reproduction

The experiments in this work can be reproduced using the AVOIDDS repository, available at this link: <https://github.com/sisl/VisionBasedAircraftDAA>.

### D.1 Test Set Evaluation

Steps for how to reproduce the test set evaluation experiment results are as follows:

1. **Download AVOIDDS dataset:** Download and extract the AVOIDDS dataset (<https://purl.stanford.edu/hj293cv5980>) and place the folder in a convenient location.
2. **Download and setup the code repository:** Download the code repository (<https://github.com/sisl/VisionBasedAircraftDAA>). Navigate to the `src/model` directory and run `pip3 install -r requirements.txt` to install the necessary dependencies for test set evaluation.

Table 4: Test set evaluation results for baseline and alternative model

| Attribute          | Value               | Baseline model |        |       | Alternative model |        |       |
|--------------------|---------------------|----------------|--------|-------|-------------------|--------|-------|
|                    |                     | Precision      | Recall | mAP   | Precision         | Recall | mAP   |
| All                | -                   | 0.997          | 0.907  | 0.866 | 0.884             | 0.928  | 0.764 |
| Clouds             | Clear               | 0.991          | 0.905  | 0.856 | 0.818             | 0.918  | 0.687 |
|                    | High Cirrus         | 1.000          | 0.930  | 0.900 | 0.943             | 0.931  | 0.827 |
|                    | Scattered           | 0.997          | 0.923  | 0.887 | 0.952             | 0.936  | 0.841 |
|                    | Broken              | 0.997          | 0.921  | 0.888 | 0.934             | 0.936  | 0.826 |
|                    | Overcast            | 0.995          | 0.920  | 0.882 | 0.857             | 0.937  | 0.747 |
|                    | Stratus             | 0.999          | 0.846  | 0.783 | 0.829             | 0.912  | 0.684 |
| Region             | Palo Alto, CA (PAO) | 0.999          | 0.930  | 0.900 | 0.984             | 0.934  | 0.865 |
|                    | Boston, MA (BOS)    | 0.996          | 0.922  | 0.885 | 0.819             | 0.938  | 0.722 |
|                    | Oshkosh, WI (OSH)   | 0.999          | 0.866  | 0.813 | 0.912             | 0.919  | 0.772 |
|                    | Reno, NV (RNO)      | 0.992          | 0.912  | 0.865 | 0.849             | 0.922  | 0.719 |
| Aircraft Type      | Cessna Skyhawk      | 0.995          | 0.844  | 0.750 | 0.880             | 0.867  | 0.643 |
|                    | Boeing 737-800      | 0.999          | 0.988  | 0.983 | 0.914             | 0.986  | 0.891 |
|                    | King Air C90        | 0.996          | 0.897  | 0.852 | 0.849             | 0.922  | 0.761 |
| Range              | 0–150 m             | 0.999          | 0.983  | 0.979 | 0.914             | 0.997  | 0.909 |
|                    | 150–500 m           | 0.997          | 0.960  | 0.942 | 0.879             | 0.979  | 0.843 |
|                    | >500 m              | 0.995          | 0.818  | 0.714 | 0.881             | 0.838  | 0.621 |
| Intruder rel. alt. | Below               | 0.995          | 0.844  | 0.847 | 0.905             | 0.920  | 0.764 |
|                    | Above               | 0.998          | 0.917  | 0.884 | 0.863             | 0.937  | 0.763 |
| Time of day        | Morning             | 0.997          | 0.911  | 0.872 | 0.929             | 0.916  | 0.785 |
|                    | Midday              | 0.998          | 0.907  | 0.866 | 0.923             | 0.927  | 0.799 |
|                    | Afternoon           | 0.998          | 0.914  | 0.878 | 0.937             | 0.940  | 0.831 |
|                    | Late Afternoon      | 0.993          | 0.897  | 0.846 | 0.767             | 0.930  | 0.657 |

3. **Begin evaluation:** Run `python3 eval.py -o baseline_results -d [PATH TO AVOIDDS DATASET]`. Results for baseline model evaluation will appear in `baseline_results.txt`. Run `python3 eval.py -o alternative_results -m ".../models/alternative.pt" -d [PATH TO AVOIDDS DATASET]` to evaluate the alternative model with results outputting to `alternative_results.txt`.

## D.2 Downstream Task Evaluation

Steps for how to reproduce the above downstream task experiment results are as follows:

1. **Download and setup the code repository:** Download the code repository (<https://github.com/sisl/VisionBasedAircraftDAA>). Navigate to the `src/simulator` directory and run `pip3 install -r requirements.txt` to install the necessary dependencies for downstream task evaluation.
2. **Setup X-Plane and aircraft:** Follow the instructions in the "Setup X-Plane" section of the benchmark repository README file (<https://github.com/sisl/VisionBasedAircraftDAA/tree/main/src/simulator>), setting the intruder aircraft as the one with which you would like to simulate encounters.
3. **Set variables for simulation:** At the bottom of the `simulate.py` file, uncomment and set the variables in the "BULK SIMULATION VARIABLE SETUP". Set `args.craft` to the aircraft you set in X-Plane in the previous step. Set `args.model_path` to the desired model as well.
4. **Begin simulation:** In the command line, run `./simulate.sh` and toggle your screen such that the X-Plane window is visible and full-screen. You will need to leave this visible for the entirety of the simulation.
5. **Repeat:** Repeat steps 2 through 4 for each desired aircraft and model.

Table 5: Downstream task evaluation results for baseline and alternative model

| Attribute     | Value               | Total Encs | Baseline model |              | Alternative model |              |
|---------------|---------------------|------------|----------------|--------------|-------------------|--------------|
|               |                     |            | NMAC frq       | Advisory frq | NMAC frq          | Advisory frq |
| All           | -                   | 8640       | 0.143          | 0.187        | 0.165             | 0.191        |
| Clouds        | Clear               | 1440       | 0.158          | 0.181        | 0.188             | 0.186        |
|               | High Cirrus         | 1440       | 0.134          | 0.192        | 0.153             | 0.206        |
|               | Scattered           | 1440       | 0.142          | 0.191        | 0.157             | 0.206        |
|               | Broken              | 1440       | 0.146          | 0.184        | 0.156             | 0.194        |
|               | Overcast            | 1440       | 0.138          | 0.188        | 0.163             | 0.183        |
|               | Stratus             | 1440       | 0.142          | 0.185        | 0.174             | 0.172        |
| Region        | Palo Alto, CA (PAO) | 2160       | 0.144          | 0.199        | 0.160             | 0.203        |
|               | Boston, MA (BOS)    | 2160       | 0.147          | 0.185        | 0.163             | 0.198        |
|               | Oshkosh, WI (OSH)   | 2160       | 0.140          | 0.180        | 0.157             | 0.190        |
|               | Reno, NV (RNO)      | 2160       | 0.141          | 0.183        | 0.180             | 0.173        |
| Aircraft Type | Cessna Skyhawk      | 2880       | 0.157          | 0.124        | 0.179             | 0.130        |
|               | Boeing 737-800      | 2880       | 0.141          | 0.280        | 0.152             | 0.287        |
|               | King Air C90        | 2880       | 0.132          | 0.156        | 0.164             | 0.156        |
| Time of day   | Morning             | 2160       | 0.140          | 0.186        | 0.178             | 0.193        |
|               | Midday              | 2160       | 0.140          | 0.188        | 0.148             | 0.195        |
|               | Afternoon           | 2160       | 0.144          | 0.188        | 0.153             | 0.194        |
|               | Late Afternoon      | 2160       | 0.149          | 0.185        | 0.181             | 0.182        |
